# Supplementary material
Source: publisher site journal article supplement (https://www.spandidos-publications.com/2059/downloadSupplementary)
Supplement: Supplementary file 1 [file downloadSupplementary]

## Sheet: Table 4
Table SIV. Protein-protein interaction data of serpin peptidase inhibitor clade A member 1 (BioGRID).
First author, year	Entrez Gene Interactor A	Entrez Gene Interactor B	BioGRID ID Interactor A	BioGRID ID Interactor B	Systematic Name Interactor A	Systematic Name Interactor B	Official Symbol Interactor A	Official Symbol Interactor B	Synonyms Interactor A	Synonyms Interactor B	Experimental System	Experimental System Type	Pubmed ID	Organism Interactor A	Organism Interactor B	Throughput	Score	Modification	Qualifications	Reference
Christensson et al, 1990	354	5265	106850	111283	-	PRO0684	KLK3	SERPINA1	APS|KLK2A1|PSA|hK3	A1A|A1AT|AAT|PI|PI1|PRO2275|alpha1AT	Affinity Capture-Western	physical	1702714	9606	9606	Low Throughput	-	-	-	(63)
Taggart et al, 2000	1991	5265	108306	111283	-	PRO0684	ELANE	SERPINA1	ELA2|GE|HLE|HNE|NE|PMN-E|SCN1	A1A|A1AT|AAT|PI|PI1|PRO2275|alpha1AT	Reconstituted Complex	physical	10867014	9606	9606	Low Throughput	-	-	-	(65)
Korkmaz et al, 2002	5657	5265	111638	111283	-	PRO0684	PRTN3	SERPINA1	ACPA|AGP7|C-ANCA|CANCA|MBN|MBT|NP-4|NP4|P29|PR-3|PR3	A1A|A1AT|AAT|PI|PI1|PRO2275|alpha1AT	Biochemical Activity	physical	12114510	9606	9606	Low Throughput	-	Proteolytic Processing	-	(64)
Hutchins et al, 2010	79003	5265	122474	111283	-	PRO0684	MIS12	SERPINA1	2510025F08Rik|KNTC2AP|MTW1|hMis12	A1A|A1AT|AAT|PI|PI1|PRO2275|alpha1AT	Affinity Capture-MS	physical	20360068	9606	9606	High Throughput	-	-	-	(67)
Wang et al, 2008	5911	5265	111846	111283	RP11-128N14.2	PRO0684	RAP2A	SERPINA1	K-REV|KREV|RAP2|RbBP-30	A1A|A1AT|AAT|PI|PI1|PRO2275|alpha1AT	Two-hybrid	physical	18624398	9606	9606	Low Throughput	-	-	-	(68)
Greenblatt et al, 2011	51009	5265	119216	111283	CGI-101	PRO0684	DERL2	SERPINA1	F-LAN-1|F-LANa|FLANa	A1A|A1AT|AAT|PI|PI1|PRO2275|alpha1AT	Affinity Capture-Western	physical	21909096	9606	9606	Low Throughput	-	-	-	(66)
Greenblatt et al, 2011	79139	5265	122559	111283	UNQ243/PRO276	PRO0684	DERL1	SERPINA1	DER-1|DER1	A1A|A1AT|AAT|PI|PI1|PRO2275|alpha1AT	Affinity Capture-Western	physical	21909096	9606	9606	Low Throughput	-	-	-	(66)
LaLonde et al, 2011	7415	5265	113258	111283	-	PRO0684	VCP	SERPINA1	ALS14|HEL-220|HEL-S-70|IBMPFD|IBMPFD1|TERA|p97	A1A|A1AT|AAT|PI|PI1|PRO2275|alpha1AT	Affinity Capture-Western	physical	21135095	9606	9606	Low Throughput	-	-	-	(69)
Christianson et al, 2008	5265	10956	111283	116156	PRO0684	-	SERPINA1	OS9	A1A|A1AT|AAT|PI|PI1|PRO2275|alpha1AT	ERLEC2|OS-9	Affinity Capture-Western	physical	18264092	9606	9606	Low Throughput	-	-	-	(71)
Christianson et al, 2008	5265	27248	111283	118096	PRO0684	UNQ1878/PRO4321	SERPINA1	ERLEC1	A1A|A1AT|AAT|PI|PI1|PRO2275|alpha1AT	C2orf30|CIM|CL24936|CL25084|HEL117|XTP3-B|XTP3TPB	Affinity Capture-Western	physical	18264092	9606	9606	Low Throughput	-	-	-	(71)
Satoh et al, 2010	10956	5265	116156	111283	-	PRO0684	OS9	SERPINA1	ERLEC2|OS-9	A1A|A1AT|AAT|PI|PI1|PRO2275|alpha1AT	Affinity Capture-Western	physical	21172656	9606	9606	Low Throughput	-	-	-	(70)
Mikami et al, 2010	10956	5265	116156	111283	-	PRO0684	OS9	SERPINA1	ERLEC2|OS-9	A1A|A1AT|AAT|PI|PI1|PRO2275|alpha1AT	Affinity Capture-Western	physical	19914915	9606	9606	Low Throughput	-	-	-	(74)
Yamaguchi et al, 2010	27248	5265	118096	111283	UNQ1878/PRO4321	PRO0684	ERLEC1	SERPINA1	C2orf30|CIM|CL24936|CL25084|HEL117|XTP3-B|XTP3TPB	A1A|A1AT|AAT|PI|PI1|PRO2275|alpha1AT	Affinity Capture-Western	physical	19917667	9606	9606	Low Throughput	-	-	-	(75)
Fujimori et al, 2013	27248	5265	118096	111283	UNQ1878/PRO4321	PRO0684	ERLEC1	SERPINA1	C2orf30|CIM|CL24936|CL25084|HEL117|XTP3-B|XTP3TPB	A1A|A1AT|AAT|PI|PI1|PRO2275|alpha1AT	Affinity Capture-Western	physical	23356641	9606	9606	Low Throughput	-	-	-	(72)
Schaafhausen et al, 2011	79001	5265	122472	111283	MSTP134	PRO0684	VKORC1	SERPINA1	EDTP308|IMAGE3455200|MST134|MST576|VKCFD2|VKOR	A1A|A1AT|AAT|PI|PI1|PRO2275|alpha1AT	Two-hybrid	physical	21103663	9606	9606	Low Throughput	-	-	-	(73)
Nagasawa et al, 2007	6745	5265	112623	111283	PSEC0262	PRO0684	SSR1	SERPINA1	TRAPA	A1A|A1AT|AAT|PI|PI1|PRO2275|alpha1AT	Affinity Capture-Western	physical	17380188	9606	9606	Low Throughput	-	-	-	(76)
Nagasawa et al, 2007	821	5265	107271	111283	-	PRO0684	CANX	SERPINA1	CNX|IP90|P90	A1A|A1AT|AAT|PI|PI1|PRO2275|alpha1AT	Affinity Capture-Western	physical	17380188	9606	9606	Low Throughput	-	-	-	(76)
Moussavi-Harami et al, 2013	2335	5265	108621	111283	-	PRO0684	FN1	SERPINA1	CIG|ED-B|FINC|FN|FNZ|GFND|GFND2|LETS|MSF	A1A|A1AT|AAT|PI|PI1|PRO2275|alpha1AT	Affinity Capture-MS	physical	23750785	9606	9606	High Throughput	-	-	P02751-15 fibronectin uniprot	(77)
Huang et al, 2013	5265	79139	111283	122559	PRO0684	UNQ243/PRO276	SERPINA1	DERL1	A1A|A1AT|AAT|PI|PI1|PRO2275|alpha1AT	DER-1|DER1	Affinity Capture-Western	physical	23867461	9606	9606	Low Throughput	-	-	-	(80)
Huang et al, 2013	5265	51009	111283	119216	PRO0684	CGI-101	SERPINA1	DERL2	A1A|A1AT|AAT|PI|PI1|PRO2275|alpha1AT	F-LAN-1|F-LANa|FLANa	Affinity Capture-Western	physical	23867461	9606	9606	Low Throughput	-	-	-	(80)
Wang et al, 2011	509	5265	106997	111283	RP11-401E9.1	PRO0684	ATP5C1	SERPINA1	ATP5C|ATP5CL1	A1A|A1AT|AAT|PI|PI1|PRO2275|alpha1AT	Two-hybrid	physical	21988832	9606	9606	High Throughput	-	-	-	(82)
Wang et al, 2011	55876	5265	120972	111283	PP4052	PRO0684	GSDMB	SERPINA1	GSDML|PRO2521	A1A|A1AT|AAT|PI|PI1|PRO2275|alpha1AT	Two-hybrid	physical	21988832	9606	9606	High Throughput	-	-	-	(82)
Wang et al, 2011	5265	4089	111283	110264	PRO0684	-	SERPINA1	SMAD4	A1A|A1AT|AAT|PI|PI1|PRO2275|alpha1AT	DPC4|JIP|MADH4|MYHRS	Two-hybrid	physical	21988832	9606	9606	High Throughput	-	-	-	(82)
Wang et al, 2011	1892	5265	108221	111283	-	PRO0684	ECHS1	SERPINA1	SCEH	A1A|A1AT|AAT|PI|PI1|PRO2275|alpha1AT	Two-hybrid	physical	21988832	9606	9606	High Throughput	-	-	-	(82)
Wang et al, 2011	6383	5265	112285	111283	-	PRO0684	SDC2	SERPINA1	CD362|HSPG|HSPG1|SYND2	A1A|A1AT|AAT|PI|PI1|PRO2275|alpha1AT	Two-hybrid	physical	21988832	9606	9606	High Throughput	-	-	-	(82)
Wang et al, 2011	25898	5265	117406	111283	-	PRO0684	RCHY1	SERPINA1	ARNIP|CHIMP|PIRH2|PRO1996|RNF199|ZCHY|ZNF363	A1A|A1AT|AAT|PI|PI1|PRO2275|alpha1AT	Two-hybrid	physical	21988832	9606	9606	High Throughput	-	-	-	(82)
Fan et al, 2013	10542	5265	115796	111283	-	PRO0684	LAMTOR5	SERPINA1	HBXIP|XIP	A1A|A1AT|AAT|PI|PI1|PRO2275|alpha1AT	Two-hybrid	physical	23241634	9606	9606	Low Throughput	-	-	-	(81)
Huttlin et al, 2015	767	5265	107222	111283	-	PRO0684	CA8	SERPINA1	CA-VIII|CALS|CAMRQ3|CARP	A1A|A1AT|AAT|PI|PI1|PRO2275|alpha1AT	Affinity Capture-MS	physical	26186194	9606	9606	High Throughput	0.999487	-	Interaction also contained in second paper after re-analysis of the data, Architecture of the human interactome defines protein communities and disease networks, PUBMED:28514442|Quantitative scores are a modified CompPASS score derived from Sowa et al., Cell, 2009 (PMID 19615732). The cut-off threshold is > 0.75.	(78)
Huttlin et al, 2015	284161	5265	129776	111283	-	PRO0684	GDPD1	SERPINA1	GDE4	A1A|A1AT|AAT|PI|PI1|PRO2275|alpha1AT	Affinity Capture-MS	physical	26186194	9606	9606	High Throughput	0.99422	-	Interaction also contained in second paper after re-analysis of the data, Architecture of the human interactome defines protein communities and disease networks, PUBMED:28514442|Quantitative scores are a modified CompPASS score derived from Sowa et al., Cell, 2009 (PMID 19615732). The cut-off threshold is > 0.75.	(78)
Huttlin et al, 2015	11269	5265	116426	111283	-	PRO0684	DDX19B	SERPINA1	DBP5|DDX19|RNAh	A1A|A1AT|AAT|PI|PI1|PRO2275|alpha1AT	Affinity Capture-MS	physical	26186194	9606	9606	High Throughput	0.998987	-	Interaction also contained in second paper after re-analysis of the data, Architecture of the human interactome defines protein communities and disease networks, PUBMED:28514442|Quantitative scores are a modified CompPASS score derived from Sowa et al., Cell, 2009 (PMID 19615732). The cut-off threshold is > 0.75.	(78)
Huttlin et al, 2015	148156	5265	127124	111283	-	PRO0684	ZNF558	SERPINA1	-	A1A|A1AT|AAT|PI|PI1|PRO2275|alpha1AT	Affinity Capture-MS	physical	26186194	9606	9606	High Throughput	0.981241	-	Interaction also contained in second paper after re-analysis of the data, Architecture of the human interactome defines protein communities and disease networks, PUBMED:28514442|Quantitative scores are a modified CompPASS score derived from Sowa et al., Cell, 2009 (PMID 19615732). The cut-off threshold is > 0.75.	(78)
Huttlin et al, 2015	79664	5265	122789	111283	UNQ3101/PRO10100	PRO0684	ICE2	SERPINA1	BRCC1|NARG2	A1A|A1AT|AAT|PI|PI1|PRO2275|alpha1AT	Affinity Capture-MS	physical	26186194	9606	9606	High Throughput	0.998676	-	Interaction also contained in second paper after re-analysis of the data, Architecture of the human interactome defines protein communities and disease networks, PUBMED:28514442|Quantitative scores are a modified CompPASS score derived from Sowa et al., Cell, 2009 (PMID 19615732). The cut-off threshold is > 0.75.	(78)
Huttlin et al, 2015	217	5265	106719	111283	-	PRO0684	ALDH2	SERPINA1	ALDH-E2|ALDHI|ALDM	A1A|A1AT|AAT|PI|PI1|PRO2275|alpha1AT	Affinity Capture-MS	physical	26186194	9606	9606	High Throughput	0.983949	-	Interaction also contained in second paper after re-analysis of the data, Architecture of the human interactome defines protein communities and disease networks, PUBMED:28514442|Quantitative scores are a modified CompPASS score derived from Sowa et al., Cell, 2009 (PMID 19615732). The cut-off threshold is > 0.75.	(78)
Huttlin et al, 2015	10769	5265	115988	111283	-	PRO0684	PLK2	SERPINA1	SNK|hPlk2|hSNK	A1A|A1AT|AAT|PI|PI1|PRO2275|alpha1AT	Affinity Capture-MS	physical	26186194	9606	9606	High Throughput	0.966888	-	Interaction also contained in second paper after re-analysis of the data, Architecture of the human interactome defines protein communities and disease networks, PUBMED:28514442|Quantitative scores are a modified CompPASS score derived from Sowa et al., Cell, 2009 (PMID 19615732). The cut-off threshold is > 0.75.	(78)
Jung et al, 2014	856454	5265	36489	111283	YHR057C	PRO0684	CPR2	SERPINA1	CYP2|peptidylprolyl isomerase CPR2|L000000463	A1A|A1AT|AAT|PI|PI1|PRO2275|alpha1AT	Synthetic Growth Defect	genetic	24502947	559292	9606	Low Throughput	-	-	Figure 1|Overexpression of Z-type alpha1-AT causes a growth defect in cpr2 mutant	(79)
Jung et al, 2014	856454	5265	36489	111283	YHR057C	PRO0684	CPR2	SERPINA1	CYP2|peptidylprolyl isomerase CPR2|L000000463	A1A|A1AT|AAT|PI|PI1|PRO2275|alpha1AT	Affinity Capture-Western	physical	24502947	559292	9606	Low Throughput	-	-	Figure 2|expressed in yeast	(79)
Dersh et al, 2014	3309	5265	109541	111283	-	PRO0684	HSPA5	SERPINA1	BIP|GRP78|HEL-S-89n|MIF2	A1A|A1AT|AAT|PI|PI1|PRO2275|alpha1AT	Affinity Capture-Western	physical	24899641	9606	9606	Low Throughput	-	-	-	(86)
Dersh et al, 2014	10956	5265	116156	111283	-	PRO0684	OS9	SERPINA1	ERLEC2|OS-9	A1A|A1AT|AAT|PI|PI1|PRO2275|alpha1AT	Affinity Capture-Western	physical	24899641	9606	9606	Low Throughput	-	-	-	(86)
Wen et al, 2015	26232	5265	117623	111283	-	PRO0684	FBXO2	SERPINA1	FBG1|FBX2|Fbs1|NFB42|OCP1	A1A|A1AT|AAT|PI|PI1|PRO2275|alpha1AT	Affinity Capture-Western	physical	26295339	9606	9606	Low Throughput	-	-	-	(85)
Feng et al, 2017	5265	84447	111283	124085	PRO0684	-	SERPINA1	SYVN1	A1A|A1AT|AAT|PI|PI1|PRO2275|alpha1AT	DER3|HRD1	Affinity Capture-Western	physical	28121484	9606	9606	Low Throughput	-	-	-	(83)
Feng et al, 2017	5265	8878	111283	114397	PRO0684	-	SERPINA1	SQSTM1	A1A|A1AT|AAT|PI|PI1|PRO2275|alpha1AT	A170|OSIL|PDB3|ZIP3|p60|p62|p62B	Affinity Capture-Western	physical	28121484	9606	9606	Low Throughput	-	-	-	(83)
Feng et al, 2017	8878	5265	114397	111283	-	PRO0684	SQSTM1	SERPINA1	A170|OSIL|PDB3|ZIP3|p60|p62|p62B	A1A|A1AT|AAT|PI|PI1|PRO2275|alpha1AT	Affinity Capture-Western	physical	28121484	9606	9606	Low Throughput	-	-	-	(83)
Huttlin et al, 2017	64794	5265	122302	111283	-	PRO0684	DDX31	SERPINA1	PPP1R25	A1A|A1AT|AAT|PI|PI1|PRO2275|alpha1AT	Affinity Capture-MS	physical	28514442	9606	9606	High Throughput	0.999995	-	Quantitative scores are a modified CompPASS score derived from Sowa et al., Cell, 2009 (PMID 19615732). The cut-off threshold is > 0.75.	(84)
Huttlin et al, 2017	5597	5265	111583	111283	-	PRO0684	MAPK6	SERPINA1	ERK3|HsT17250|PRKM6|p97MAPK	A1A|A1AT|AAT|PI|PI1|PRO2275|alpha1AT	Affinity Capture-MS	physical	28514442	9606	9606	High Throughput	0.999992	-	Quantitative scores are a modified CompPASS score derived from Sowa et al., Cell, 2009 (PMID 19615732). The cut-off threshold is > 0.75.	(84)
Huttlin et al, 2017	81609	5265	123546	111283	RP11-98D18.12-005	PRO0684	SNX27	SERPINA1	MRT1|MY014	A1A|A1AT|AAT|PI|PI1|PRO2275|alpha1AT	Affinity Capture-MS	physical	28514442	9606	9606	High Throughput	0.999822	-	Quantitative scores are a modified CompPASS score derived from Sowa et al., Cell, 2009 (PMID 19615732). The cut-off threshold is > 0.75.	(84)
Huttlin et al, 2017	767	5265	107222	111283	-	PRO0684	CA8	SERPINA1	CA-VIII|CALS|CAMRQ3|CARP	A1A|A1AT|AAT|PI|PI1|PRO2275|alpha1AT	Affinity Capture-MS	physical	28514442	9606	9606	High Throughput	0.999796	-	Quantitative scores are a modified CompPASS score derived from Sowa et al., Cell, 2009 (PMID 19615732). The cut-off threshold is > 0.75.|Re-analysis of the data from the first paper, The BioPlex Network: A Systematic Exploration of the Human Interactome, PUBMED:26186194	(84)
Huttlin et al, 2017	11269	5265	116426	111283	-	PRO0684	DDX19B	SERPINA1	DBP5|DDX19|RNAh	A1A|A1AT|AAT|PI|PI1|PRO2275|alpha1AT	Affinity Capture-MS	physical	28514442	9606	9606	High Throughput	0.999697	-	Quantitative scores are a modified CompPASS score derived from Sowa et al., Cell, 2009 (PMID 19615732). The cut-off threshold is > 0.75.|Re-analysis of the data from the first paper, The BioPlex Network: A Systematic Exploration of the Human Interactome, PUBMED:26186194	(84)
Huttlin et al, 2017	79664	5265	122789	111283	UNQ3101/PRO10100	PRO0684	ICE2	SERPINA1	BRCC1|NARG2	A1A|A1AT|AAT|PI|PI1|PRO2275|alpha1AT	Affinity Capture-MS	physical	28514442	9606	9606	High Throughput	0.999388	-	Quantitative scores are a modified CompPASS score derived from Sowa et al., Cell, 2009 (PMID 19615732). The cut-off threshold is > 0.75.|Re-analysis of the data from the first paper, The BioPlex Network: A Systematic Exploration of the Human Interactome, PUBMED:26186194	(84)
Huttlin et al, 2017	284161	5265	129776	111283	-	PRO0684	GDPD1	SERPINA1	GDE4	A1A|A1AT|AAT|PI|PI1|PRO2275|alpha1AT	Affinity Capture-MS	physical	28514442	9606	9606	High Throughput	0.998343	-	Quantitative scores are a modified CompPASS score derived from Sowa et al., Cell, 2009 (PMID 19615732). The cut-off threshold is > 0.75.|Re-analysis of the data from the first paper, The BioPlex Network: A Systematic Exploration of the Human Interactome, PUBMED:26186194	(84)
Huttlin et al, 2017	137362	5265	126475	111283	-	PRO0684	GOT1L1	SERPINA1	-	A1A|A1AT|AAT|PI|PI1|PRO2275|alpha1AT	Affinity Capture-MS	physical	28514442	9606	9606	High Throughput	0.99645	-	Quantitative scores are a modified CompPASS score derived from Sowa et al., Cell, 2009 (PMID 19615732). The cut-off threshold is > 0.75.	(84)
Huttlin et al, 2017	3312	5265	109544	111283	-	PRO0684	HSPA8	SERPINA1	HEL-33|HEL-S-72p|HSC54|HSC70|HSC71|HSP71|HSP73|HSPA10|LAP-1|LAP1|NIP71	A1A|A1AT|AAT|PI|PI1|PRO2275|alpha1AT	Affinity Capture-MS	physical	28514442	9606	9606	High Throughput	0.991874	-	Quantitative scores are a modified CompPASS score derived from Sowa et al., Cell, 2009 (PMID 19615732). The cut-off threshold is > 0.75.	(84)
Huttlin et al, 2017	217	5265	106719	111283	-	PRO0684	ALDH2	SERPINA1	ALDH-E2|ALDHI|ALDM	A1A|A1AT|AAT|PI|PI1|PRO2275|alpha1AT	Affinity Capture-MS	physical	28514442	9606	9606	High Throughput	0.99168	-	Quantitative scores are a modified CompPASS score derived from Sowa et al., Cell, 2009 (PMID 19615732). The cut-off threshold is > 0.75.|Re-analysis of the data from the first paper, The BioPlex Network: A Systematic Exploration of the Human Interactome, PUBMED:26186194	(84)
Huttlin et al, 2017	148156	5265	127124	111283	-	PRO0684	ZNF558	SERPINA1	-	A1A|A1AT|AAT|PI|PI1|PRO2275|alpha1AT	Affinity Capture-MS	physical	28514442	9606	9606	High Throughput	0.990115	-	Quantitative scores are a modified CompPASS score derived from Sowa et al., Cell, 2009 (PMID 19615732). The cut-off threshold is > 0.75.|Re-analysis of the data from the first paper, The BioPlex Network: A Systematic Exploration of the Human Interactome, PUBMED:26186194	(84)
Huttlin et al, 2017	10769	5265	115988	111283	-	PRO0684	PLK2	SERPINA1	SNK|hPlk2|hSNK	A1A|A1AT|AAT|PI|PI1|PRO2275|alpha1AT	Affinity Capture-MS	physical	28514442	9606	9606	High Throughput	0.97974	-	Quantitative scores are a modified CompPASS score derived from Sowa et al., Cell, 2009 (PMID 19615732). The cut-off threshold is > 0.75.|Re-analysis of the data from the first paper, The BioPlex Network: A Systematic Exploration of the Human Interactome, PUBMED:26186194	(84)
Huttlin et al, 2017	65110	5265	122397	111283	RP11-569D9.1	PRO0684	UPF3A	SERPINA1	HUPF3A|RENT3A|UPF3	A1A|A1AT|AAT|PI|PI1|PRO2275|alpha1AT	Affinity Capture-MS	physical	28514442	9606	9606	High Throughput	0.967743	-	Quantitative scores are a modified CompPASS score derived from Sowa et al., Cell, 2009 (PMID 19615732). The cut-off threshold is > 0.75.	(84)
Kadowaki et al, 2015	79139	5265	122559	111283	UNQ243/PRO276	PRO0684	DERL1	SERPINA1	DER-1|DER1	A1A|A1AT|AAT|PI|PI1|PRO2275|alpha1AT	Affinity Capture-Western	physical	26565908	9606	9606	Low Throughput	-	-	-	(89)
Kadowaki et al, 2015	51009	5265	119216	111283	CGI-101	PRO0684	DERL2	SERPINA1	F-LAN-1|F-LANa|FLANa	A1A|A1AT|AAT|PI|PI1|PRO2275|alpha1AT	Affinity Capture-Western	physical	26565908	9606	9606	Low Throughput	-	-	-	(89)
Kadowaki et al, 2015	91319	5265	124816	111283	-	PRO0684	DERL3	SERPINA1	C22orf14|IZP6|LLN2|derlin-3	A1A|A1AT|AAT|PI|PI1|PRO2275|alpha1AT	Affinity Capture-Western	physical	26565908	9606	9606	Low Throughput	-	-	-	(89)
Kadowaki et al, 2015	5265	6729	111283	112607	PRO0684	-	SERPINA1	SRP54	A1A|A1AT|AAT|PI|PI1|PRO2275|alpha1AT	-	Affinity Capture-Western	physical	26565908	9606	9606	Low Throughput	-	-	-	(89)
Kadowaki et al, 2015	5265	79139	111283	122559	PRO0684	UNQ243/PRO276	SERPINA1	DERL1	A1A|A1AT|AAT|PI|PI1|PRO2275|alpha1AT	DER-1|DER1	Affinity Capture-Western	physical	26565908	9606	9606	Low Throughput	-	-	-	(89)
Kadowaki et al, 2015	5265	51009	111283	119216	PRO0684	CGI-101	SERPINA1	DERL2	A1A|A1AT|AAT|PI|PI1|PRO2275|alpha1AT	F-LAN-1|F-LANa|FLANa	Affinity Capture-Western	physical	26565908	9606	9606	Low Throughput	-	-	-	(89)
Kadowaki et al, 2015	5265	91319	111283	124816	PRO0684	-	SERPINA1	DERL3	A1A|A1AT|AAT|PI|PI1|PRO2275|alpha1AT	C22orf14|IZP6|LLN2|derlin-3	Affinity Capture-Western	physical	26565908	9606	9606	Low Throughput	-	-	-	(89)
Pankow et al, 2015	1080	5265	107506	111283	tcag7.78	PRO0684	CFTR	SERPINA1	ABC35|ABCC7|CF|CFTR/MRP|MRP7|TNR-CFTR|dJ760C5.1	A1A|A1AT|AAT|PI|PI1|PRO2275|alpha1AT	Affinity Capture-MS	physical	26618866	9606	9606	High Throughput	-	-	Co-Purifying Protein Identification Technology (CoPIT)	(90)
Khodayari et al, 2017	5265	7415	111283	113258	PRO0684	-	SERPINA1	VCP	A1A|A1AT|AAT|PI|PI1|PRO2275|alpha1AT	ALS14|HEL-220|HEL-S-70|IBMPFD|IBMPFD1|TERA|p97	Affinity Capture-Western	physical	28301499	9606	9606	Low Throughput	-	-	-	(87)
Xiao et al, 2017	2740	5265	109002	111283	-	PRO0684	GLP1R	SERPINA1	-	A1A|A1AT|AAT|PI|PI1|PRO2275|alpha1AT	PCA	physical	28597972	9606	9606	High Throughput	-	-	-	(88)
Kadowaki et al, 2018	79139	5265	122559	111283	UNQ243/PRO276	PRO0684	DERL1	SERPINA1	DER-1|DER1	A1A|A1AT|AAT|PI|PI1|PRO2275|alpha1AT	Affinity Capture-Western	physical	29743537	9606	9606	Low Throughput	-	-	-	(91)
Kadowaki et al, 2018	5265	84447	111283	124085	PRO0684	-	SERPINA1	SYVN1	A1A|A1AT|AAT|PI|PI1|PRO2275|alpha1AT	DER3|HRD1	Affinity Capture-Western	physical	29743537	9606	9606	Low Throughput	-	-	-	(91)
Giurato et al, 2018	2100	5265	108404	111283	-	PRO0684	ESR2	SERPINA1	ER-BETA|ESR-BETA|ESRB|ESTRB|Erb|NR3A2	A1A|A1AT|AAT|PI|PI1|PRO2275|alpha1AT	Affinity Capture-MS	physical	29509190	9606	9606	High Throughput	-	-	-	(92)
Yu et al, 2018	81567	5265	123529	111283	RP1-126E20.1	PRO0684	TXNDC5	SERPINA1	ENDOPDI|ERP46|HCC-2|PDIA15|STRF8|UNQ364	A1A|A1AT|AAT|PI|PI1|PRO2275|alpha1AT	Affinity Capture-Western	physical	29784879	9606	9606	Low Throughput	-	-	-	(93)
Yu et al, 2018	5265	80267	111283	123207	PRO0684	-	SERPINA1	EDEM3	A1A|A1AT|AAT|PI|PI1|PRO2275|alpha1AT	C1orf22	Affinity Capture-Western	physical	29784879	9606	9606	Low Throughput	-	-	-	(93)
Yu et al, 2018	5265	81567	111283	123529	PRO0684	RP1-126E20.1	SERPINA1	TXNDC5	A1A|A1AT|AAT|PI|PI1|PRO2275|alpha1AT	ENDOPDI|ERP46|HCC-2|PDIA15|STRF8|UNQ364	Affinity Capture-Western	physical	29784879	9606	9606	Low Throughput	-	-	-	(93)
Lamriben et al, 2018	9695	5265	115047	111283	-	PRO0684	EDEM1	SERPINA1	EDEM	A1A|A1AT|AAT|PI|PI1|PRO2275|alpha1AT	Affinity Capture-Western	physical	30021839	9606	9606	Low Throughput	-	-	immunoprecipitated bait proteins interacted with [35S]Cys/Met-labeled hit proteins	(94)
Lamriben et al, 2018	5265	9695	111283	115047	PRO0684	-	SERPINA1	EDEM1	A1A|A1AT|AAT|PI|PI1|PRO2275|alpha1AT	EDEM	Affinity Capture-Western	physical	30021839	9606	9606	Low Throughput	-	-	immunoprecipitated bait proteins interacted with [35S]Cys/Met-labeled hit proteins	(94)
